# Supplementary material
Source: publisher figshare collection journal article supplement (https://rs.figshare.com/ndownloader/files/22246689)
Supplement: Supplementary file [file 22246689]

Supplementary Material for:

Entropic bonding of the type 1 pilus from experiment and simulation

Fabiano Corsetti, Alvaro Alonso-Caballero, Simon Poly, Raul Perez-Jimenez, Emilio Artacho

**EXAMPLES OF REJECTED TRACES**

Fig. S1 shows some examples of force-extension traces rejected by the automatic processing procedure.

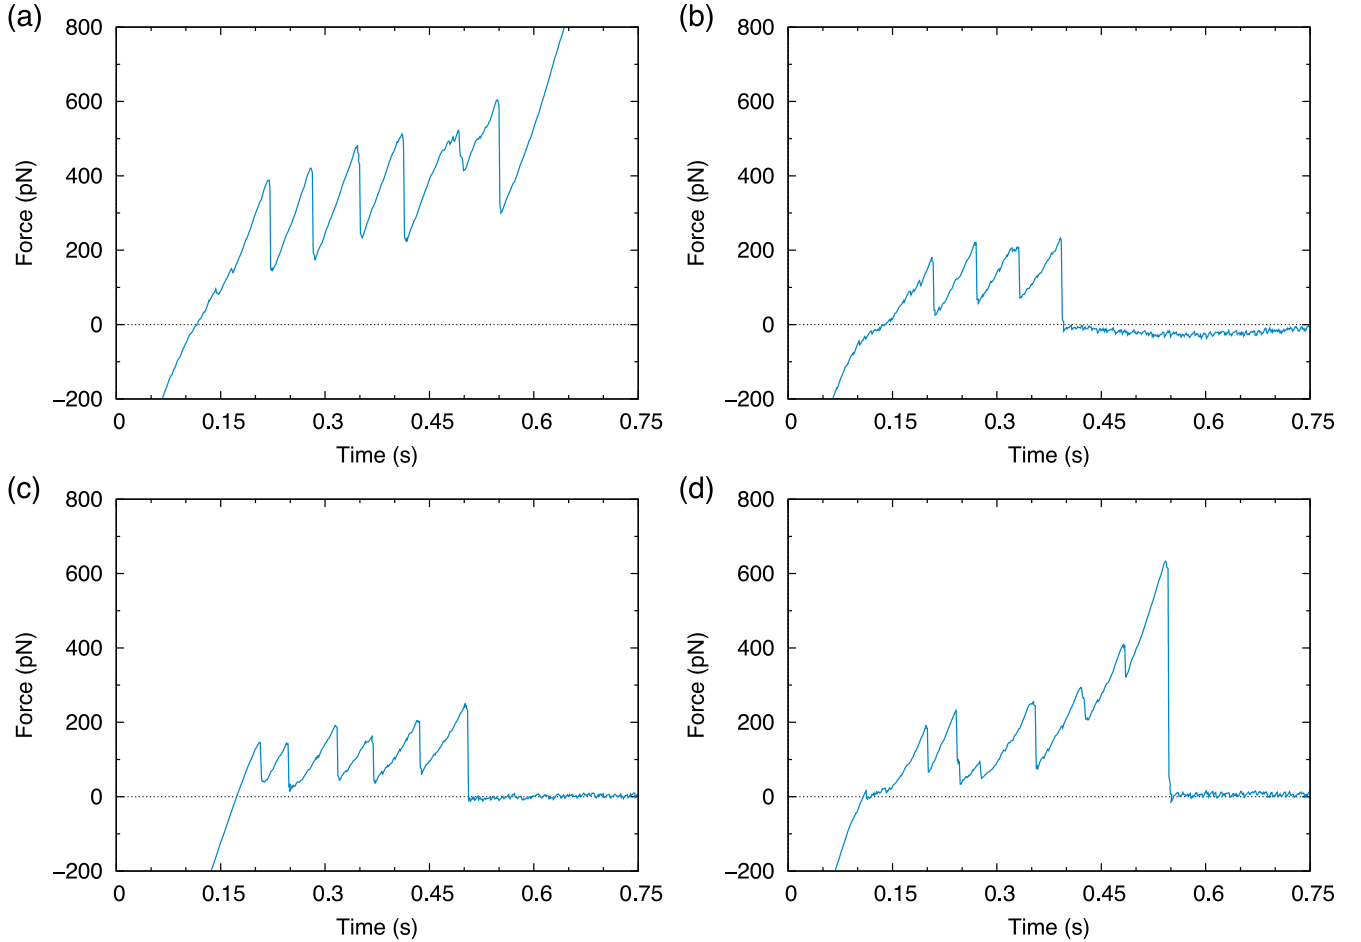

FIG. S1. **Examples of rejected experimental traces.** The reasons for rejection are: (a) no flat region at the end of the trace; (b) too few peaks; (c) fitted WLC curves not close enough to the real trace; (d) unreasonable values for the domain contour lengths.

**WORM-LIKE CHAIN AND FREELY-JOINTED CHAIN MODELS**

The worm-like chain (WLC) model used to fit the branches of the experimental traces is that of Bouchiat *et al.* [1], given by:

$$f = \left( \frac{k_B T}{P} \right) \left[ \frac{1}{4(1-x/s)^2} - \frac{1}{4} + \sum_{i=1}^7 \alpha_i \left( \frac{x}{s} \right)^i \right], \quad (\text{S1})$$

where  $f$  is the force,  $x$  is the end-to-end extension,  $s$  is the contour length,  $P$  is the persistence length,  $k_B$  is Boltzmann's constant,  $T$  is the temperature, and the coefficients of the polynomial expansion are  $\alpha_1 = 1$ ,  $\alpha_2 = -0.5164228$ ,  $\alpha_3 = -2.737418$ ,  $\alpha_4 = 16.07497$ ,  $\alpha_5 = -38.87607$ ,  $\alpha_6 = 39.49944$ ,  $\alpha_7 = -14.17718$ .

The freely-jointed chain (FJC) model used to fit the last part of the simulated traces is that of Smith *et al.* [2], given by:

$$x = s \left[ \coth \frac{2Pf}{k_B T} - \frac{k_B T}{2Pf} \right] \left( 1 + \frac{f}{K} \right), \quad (\text{S2})$$

where  $K$  is the elastic modulus.

- 
- [1] C. Bouchiat, M. D. Wang, J.-F. Allemand, T. Strick, S. M. Block, and V. Croquette, *Biophys. J.* **76**, 409 (1999).  
 [2] S. B. Smith, Y. Cui, and C. Bustamante, *Science* **271**, 795 (1996).
